# Supplementary material
Source: publisher site journal article supplement (https://www.dovepress.com/article/280886)
Supplement: Supplementary file 1 [file get_supplementary_file.php]

**Table S1. The primers of genes used in this study for pyrosequencing**

| **Genes** | **Forward PCR Primer (5’-3’)** | **Reverse PCR Primer (5’-3’)** | **Sequencing Primer (5’-3’)** |
| --- | --- | --- | --- |
| ***LEPR*** | GTTAAGTTTTTTAAAGTAAGGGTTTTTAGG | TAATCAAATTAACCCCTAAACTCTAAACT | AGTAGGGTTTAAGATTTTTAAAT |
| ***LPHN3*** | TGTTTTTTAGTTGAAAAGTTGGGTTT | ACCCCCAAAATTCACCAT | GTTGAAAAGTTGGGTTTAT |
| ***WNT6*** | ATTGTTTGAAGTAGGGTTTAAGATT | TAATCAAATTAACCCCTAAACTCTAAACT | AGTAGGGTTTAAGATTTTTAAAT |
| ***HOXA4*** | GTTAAGTTTTTTAAAGTAAGGGTTTTTAGG | ACCACCAAACACATTTTCTCA | GTGGGGAAGGGGGAT |

**Table S2. Parts of hypo- or hyper- methylated genes**

| **probeID** | **A_AVG** | **N_AVG** | **Delta Beta** | **adj.P.Val** | **RefGene_Name** |
| --- | --- | --- | --- | --- | --- |
| cg16265717 | 0.017264401 | 0.902129776 | -0.884865374 | 1.29E-06 | *LEPR* |
| cg10380546 | 0.886601845 | 0.483276766 | 0.403325079 | 1.29E-06 | *AP2A2* |
| cg22997113 | 0.921388162 | 0.454096097 | 0.467292065 | 8.12E-06 | *HOXA4* |
| cg26066361 | 0.020129191 | 0.782804551 | -0.76267536 | 2.11E-05 | *CLEC7A* |
| cg08899895 | 0.6689601 | 0.390276889 | 0.27868321 | 2.11E-05 | *KIAA0182* |
| cg10153341 | 0.910133665 | 0.507205678 | 0.402927987 | 2.12E-05 | *MAN1A1* |
| cg26316423 | 0.015221197 | 0.843849155 | -0.828627958 | 2.47E-05 | *IL2RA* |
| cg18537183 | 0.834881383 | 0.419894458 | 0.414986924 | 2.63E-05 | *XRCC3* |
| cg03877706 | 0.019425448 | 0.799044681 | -0.779619233 | 2.63E-05 | *NCAM2* |
| cg14390798 | 0.863821412 | 0.534346987 | 0.329474425 | 2.63E-05 | *RNU6-71P* |
| cg26687173 | 0.933636879 | 0.625857828 | 0.307779051 | 2.63E-05 | *WDR88* |
| cg24169822 | 0.863616213 | 0.196634453 | 0.66698176 | 2.63E-05 | *HOXA4* |
| cg00819317 | 0.019489382 | 0.812720866 | -0.793231484 | 4.76E-05 | *OSMR* |
| cg11795881 | 0.020932673 | 0.658670479 | -0.637737807 | 5.93E-05 | *VPS50* |
| cg12798040 | 0.908690366 | 0.649034343 | 0.259656023 | 6.57E-05 | *XRCC3* |
| cg19832347 | 0.027374032 | 0.76057847 | -0.733204438 | 9.13E-05 | *C1QTNF9* |
| cg02597894 | 0.86839973 | 0.545576271 | 0.322823459 | 9.13E-05 | *VARS* |
| cg14167852 | 0.854817264 | 0.297154997 | 0.557662267 | 9.48E-05 | *FRY-AS1* |
| cg06869761 | 0.951137949 | 0.534333886 | 0.416804063 | 9.48E-05 | *OLA1* |
| cg02349264 | 0.962343507 | 0.516700354 | 0.445643153 | 0.000105827 | *CARHSP1* |

**Notes:** A represents the untreated patients; N represents the healthy donors.

**Table S3. Parts of Go_ terms from GO analysis of the hyper- and hypomethylated genes**

| **GO_ID** | **GO_term** | **FDR** |
| --- | --- | --- |
| GO:0030154 | cell differentiation | 5.63E-16 |
| GO:0009966 | regulation of signal transduction | 3.86E-14 |
| GO:0043410 | positive regulation of MAPK cascade | 6.13E-07 |
| GO:0007266 | Rho protein signal transduction | 2.05E-06 |
| GO:0042127 | regulation of cell proliferation | 0.001176102 |
| GO:0030217 | T cell differentiation | 0.002202857 |
| GO:0010721 | negative regulation of cell development | 0.008260714 |
| GO:0046427 | positive regulation of JAK-STAT cascade | 0.030343812 |
| GO:0198738 | cell-cell signaling by wnt | 0.102489828 |
| GO:0016055 | Wnt signaling pathway | 0.12715931 |
| GO:0006915 | apoptotic process | 0.128849185 |
| GO:0006915 | apoptotic process | 0.128849185 |
| GO:2000273 | positive regulation of receptor activity | 0.129725233 |
| GO:0009820 | alkaloid metabolic process | 0.131035034 |
| GO:0014832 | urinary bladder smooth muscle contraction | 0.131035034 |
| GO:0014848 | urinary tract smooth muscle contraction | 0.131035034 |
| GO:0015889 | cobalamin transport | 0.131035034 |
| GO:0030913 | paranodal junction assembly | 0.131035034 |
| GO:0031622 | positive regulation of fever generation | 0.131035034 |
| GO:0032287 | peripheral nervous system myelin maintenance | 0.131035034 |
| GO:0033564 | anterior/posterior axon guidance | 0.131035034 |

**Table S4. Hypo-and hyper-methylated genes in invalid group compared to those in healthy group**

| **probeID** | **P.Value** | **Invalid group_AVG** | **control_AVG** | **deltaBeta** | **RefGene_Name** |
| --- | --- | --- | --- | --- | --- |
| cg02771577 | 0.002242567 | 0.587544302 | 0.746665383 | -0.159121081 | *AJAP1* |
| cg08852911 | 0.007928741 | 0.560646831 | 0.713827031 | -0.1531802 | *TP73* |
| cg05785102 | 0.00713896 | 0.535780115 | 0.669747416 | -0.133967301 | *NDUFB10* |
| cg02428906 | 0.00566476 | 0.950077675 | 0.848559211 | 0.101518464 | *ARHGAP1* |
| cg15490177 | 0.006819614 | 0.666864189 | 0.564476548 | 0.10238764 | *LRBA* |
| cg15650719 | 0.001616392 | 0.748366456 | 0.645267746 | 0.10309871 | *ADCY7* |
| cg26709300 | 0.00018239 | 0.808775772 | 0.705600895 | 0.103174877 | *YPEL3* |
| cg20580858 | 0.002836896 | 0.878618228 | 0.775358146 | 0.103260082 | *C6orf89* |
| cg20800004 | 0.007041889 | 0.869573262 | 0.765697335 | 0.103875927 | *DAP3* |
| cg03514381 | 0.009849441 | 0.916472927 | 0.81243294 | 0.104039987 | *COQ3* |
| cg14557669 | 0.008548117 | 0.782004575 | 0.67742192 | 0.104582655 | *MYO1D* |
| cg05045912 | 0.001765646 | 0.817843655 | 0.712924243 | 0.104919412 | *PPP2R2C* |
| cg11801086 | 0.001138934 | 0.884889853 | 0.778968485 | 0.105921369 | *KIF6* |
| cg01286685 | 0.008423665 | 0.74670732 | 0.639530131 | 0.107177189 | *RNF39* |
| cg02554627 | 0.006574127 | 0.63691895 | 0.529589261 | 0.10732969 | *PTPN1* |
| cg19702703 | 0.005571615 | 0.840324001 | 0.732231288 | 0.108092713 | *AFAP1* |
| cg26468699 | 0.007971334 | 0.29415407 | 0.184452612 | 0.109701457 | *NAB1* |
| cg04622454 | 0.006074883 | 0.559350178 | 0.446377617 | 0.112972561 | *NELF* |
| cg09082617 | 0.003537592 | 0.789588264 | 0.675773745 | 0.113814519 | *MIR645* |
| cg21412128 | 0.00693809 | 0.823607072 | 0.709675128 | 0.113931944 | *GPR182* |
| cg19377250 | 0.001265802 | 0.735128913 | 0.621016437 | 0.114112477 | *SLC12A9* |
| cg17485681 | 0.000937563 | 0.820353834 | 0.705295681 | 0.115058154 | *CDH23* |
| cg14583203 | 0.007112626 | 0.776429858 | 0.660628886 | 0.115800973 | *GPR182* |
| cg10493186 | 0.000333714 | 0.659969644 | 0.543511801 | 0.116457843 | *PRDM16* |
| cg08531508 | 0.003466622 | 0.799351876 | 0.68188709 | 0.117464786 | *GTF2A1* |
| cg18245230 | 0.00951194 | 0.500031304 | 0.381829875 | 0.118201429 | *DNAJB6* |
| cg14873380 | 0.004815808 | 0.827714737 | 0.709410401 | 0.118304337 | *ADGRF2* |
| cg18608703 | 0.009975069 | 0.827068104 | 0.707990627 | 0.119077477 | *CFTR* |
| cg02182444 | 0.008486341 | 0.672902335 | 0.553598242 | 0.119304093 | *NUBPL* |
| cg02500195 | 0.002890826 | 0.913715473 | 0.793735547 | 0.119979927 | *ADAMTS17* |
| cg00300908 | 0.006269081 | 0.513109253 | 0.39189833 | 0.121210923 | *C15orf27* |
| cg13903421 | 0.006394365 | 0.669420556 | 0.547962421 | 0.121458136 | *WNT6* |
| cg08397665 | 0.004139051 | 0.907434528 | 0.785898901 | 0.121535626 | *DIAPH1* |
| cg03827836 | 0.009061339 | 0.801848215 | 0.679020602 | 0.122827613 | *MORN1* |
| cg22159528 | 0.009757171 | 0.496831007 | 0.372118428 | 0.124712579 | *ZNF575* |
| cg05513069 | 0.007576475 | 0.406923619 | 0.28194903 | 0.12497459 | *PSTPIP2* |
| cg02748105 | 0.00165504 | 0.929263791 | 0.803264317 | 0.125999474 | *SNORD115-48* |
| cg14177325 | 0.005976778 | 0.786730458 | 0.659324025 | 0.127406432 | *SCARF1* |
| cg17333973 | 0.004791727 | 0.505483186 | 0.377953251 | 0.127529935 | *KCNQ1* |
| cg15720832 | 0.009552306 | 0.909441694 | 0.780709393 | 0.128732301 | *C1orf35* |
| cg15399793 | 0.000342891 | 0.772191931 | 0.643436359 | 0.128755572 | *UBFD1* |

**Table S5. Parts of the hypermethylated genes in effective group comparing with those in the healthy donors**

| **deltaBeta** | **RefGene_Name** | **deltaBeta** | **RefGene_Name** |
| --- | --- | --- | --- |
| 0.100649052 | ACSF3 | 0.15373276 | *EXOSC2* |
| 0.108031856 | ALOX12 | 0.114278941 | *FAM38B* |
| 0.152588047 | ALOX5 | 0.185219465 | *FAM65B* |
| 0.103240467 | AMN | 0.101950241 | *FMN1* |
| 0.114059026 | ANK1 | 0.100379754 | *FOXK1* |
| 0.104407062 | AP2A2 | 0.16331009 | *FRY-AS1* |
| 0.179052681 | C10orf82 | 0.10881266 | *GMDS* |
| 0.117571965 | C13orf30 | 0.102338784 | *HK2* |
| 0.115376803 | C1QL3 | 0.143965523 | *HLA-DPB2* |
| 0.125151201 | CARHSP1 | 0.333956301 | *HLA-DRB1* |
| 0.10792373 | CBFA2T3 | 0.103124757 | *HOXA4* |
| 0.136733473 | CCDC88C | 0.124865143 | *ITGA3* |
| 0.104747456 | CCL16 | 0.114868344 | *KCNH2* |
| 0.123776205 | CDK6 | 0.105497769 | *KDM2B* |
| 0.137679417 | CLDN6 | 0.137784566 | *KIAA1529* |
| 0.100875187 | CMYA5 | 0.125370003 | *KIF12* |
| 0.134196987 | CNTNAP1 | 0.115687543 | *KRTCAP3* |
| 0.104152267 | DPH5 | 0.10030757 | *LGR5* |
| 0.152773644 | EBF4 | 0.142401627 | *LHX6* |
| 0.160312944 | EDEM3 | 0.113856619 | *ETV6* |

**Table S6. Parts of the hypomethylated genes in effective group comparing with those in the healthy donors**

| **deltaBeta** | **RefGene_Name** | **deltaBeta** | **RefGene_Name** |
| --- | --- | --- | --- |
| -0.121802833 | ABCC8 | -0.198982684 | *DCDC5* |
| -0.228604241 | ABLIM1 | -0.172812878 | *DDX39* |
| -0.104390873 | ACOXL | -0.102782068 | *DIP2C* |
| -0.105086553 | AHRR | -0.224757387 | *DLGAP1* |
| -0.136574757 | ATG4C | -0.143744371 | *DSCAML1* |
| -0.231170279 | BANK1 | -0.119258001 | *DTWD2* |
| -0.208171285 | C1QTNF9 | -0.19919899 | *EBF1* |
| -0.115826275 | C6orf27 | -0.109479142 | *EDN2* |
| -0.205123067 | CACNA1D | -0.119074393 | *ENTPD4* |
| -0.208890078 | CASC2 | -0.111612092 | *EPHA10* |
| -0.110337605 | CASQ2 | -0.105509132 | *FAM171A1* |
| -0.128612082 | CCDC149 | -0.13227347 | *FOXP4* |
| -0.121278509 | CDKAL1 | -0.205203421 | *GAS2* |
| -0.188989029 | CDKN2B-AS1 | -0.211679713 | *GIPC1* |
| -0.219303331 | CHN1 | -0.123821936 | *GNAQ* |
| -0.15552457 | CISH | -0.119797067 | *GPATCH2L* |
| -0.101948921 | CLDN11 | -0.15848024 | *GPR83* |
| -0.217559039 | CLEC7A | -0.192342688 | *HLA-DOA* |
| -0.199587641 | CLVS1 | -0.236165734 | *IL1RAP* |
| -0.23084126 | ITGA2 | -0.192682677 | *IL2RA* |
